# Supplementary material
Source: MDPI journal article supplement (https://www.mdpi.com/2227-9717/12/5/883)
Supplement: s1 [file s1 › processes-2960051-supplementary.pdf]

## Supporting information

### Numerical simulation of mixing and salt washing effects of static mixer in electric desalination process

Yuhang Liu<sup>1</sup>, Mengmeng Gao<sup>1</sup>, Zibin Huang<sup>1</sup>, Hongfu Wang<sup>2</sup>, Peiqing Yuan<sup>3</sup>, Xinru Xu<sup>1</sup>, Jingyi Yang<sup>1,\*</sup>

<sup>1</sup>International Joint Research Center of Green Energy Chemical Engineering, East China University of Science and Technology, Meilong Road 130, Shanghai 200237, China.

<sup>2</sup>Santacc Energy Co., Ltd, No.2 Zhongdian Ave, Yangzhong, Zhenjiang 212200, China.

<sup>3</sup>State Key Laboratory of Chemical Engineering, East China University of Science and Technology, Meilong Road 130, Shanghai 200237, China.

\*Corresponding author. E-mail address: [jyyang@ecust.edu.cn](mailto:jyyang@ecust.edu.cn); Tel.: 86-21-64252434

#### Text S1

The supplementary literature provides information on the specific distribution of oil and water.

(A)

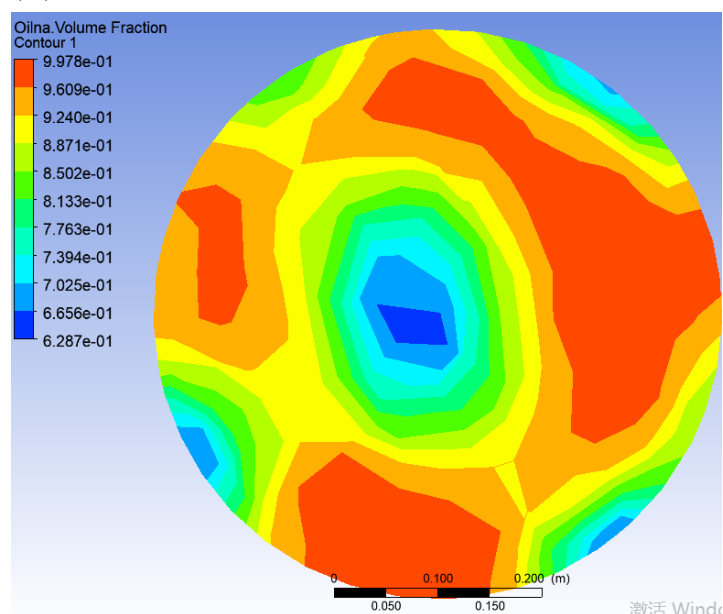

(B)

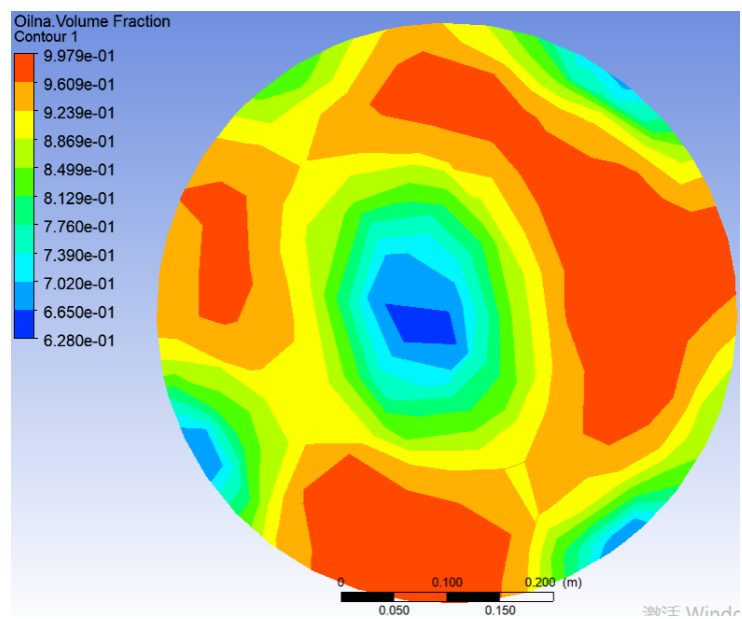

(C)

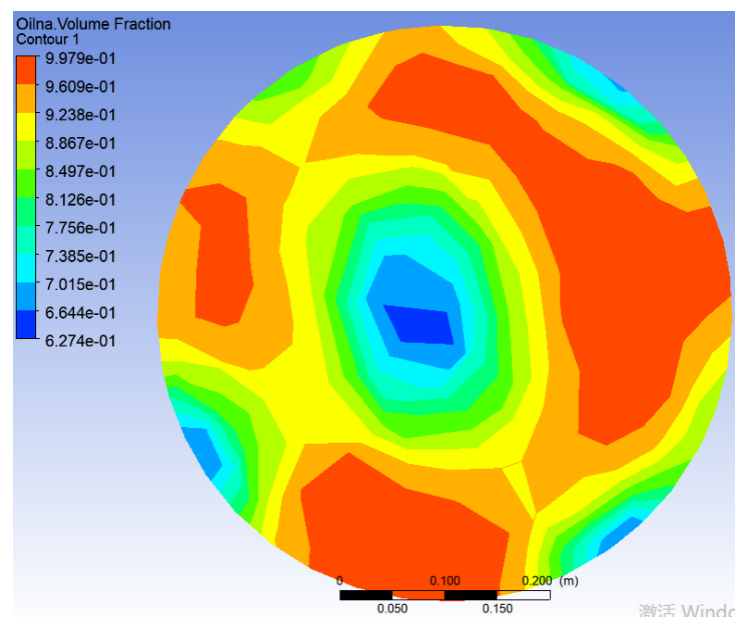

(D)

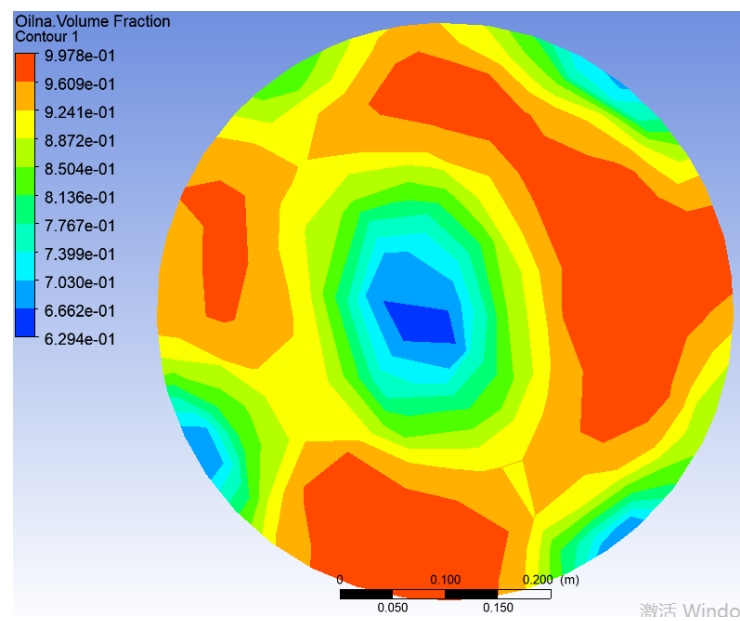

**Figure S1.** Distribution of oil and water at the outlet with different oil density  
(A) 860Kg/m<sup>3</sup>(B) 880Kg/m<sup>3</sup>(C) 890Kg/m<sup>3</sup> (D) 900Kg/m<sup>3</sup>

(A)

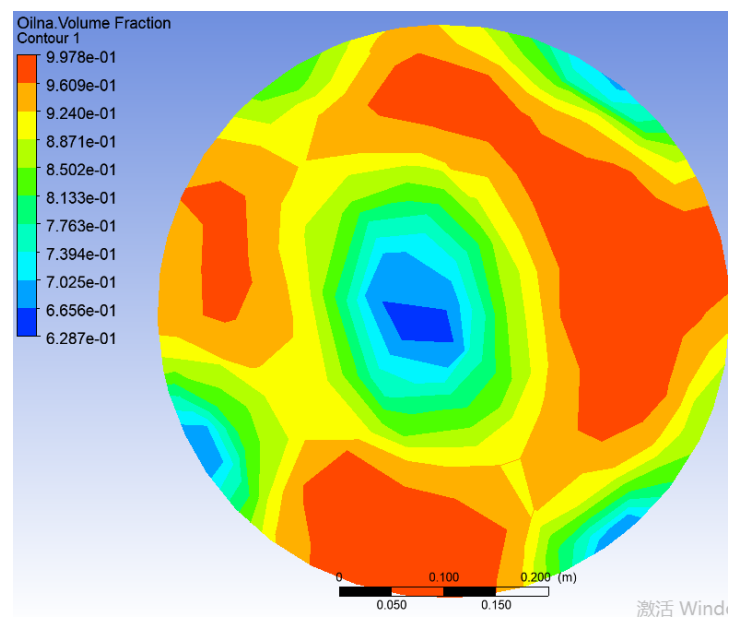

(B)

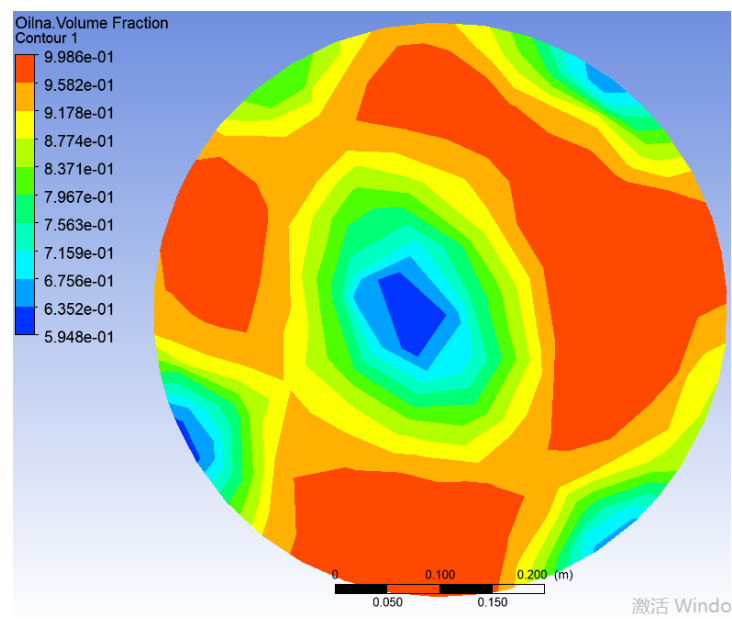

(C)

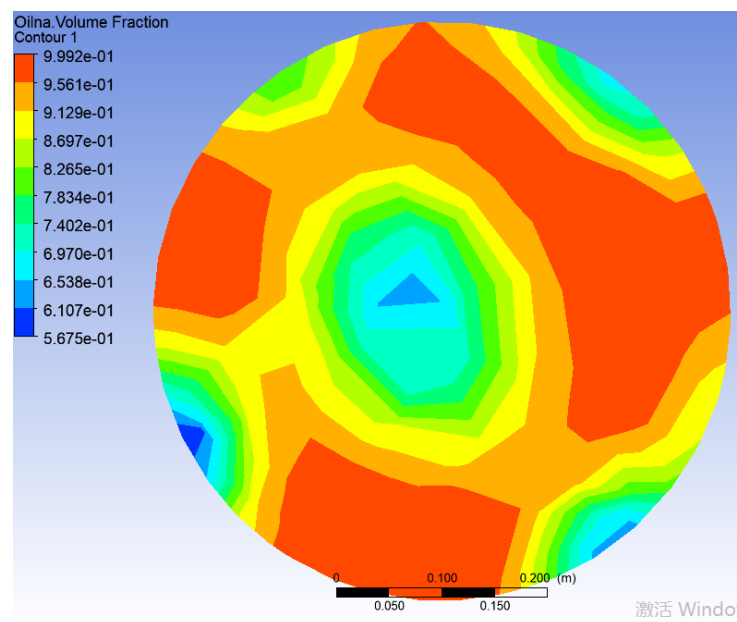

(D)

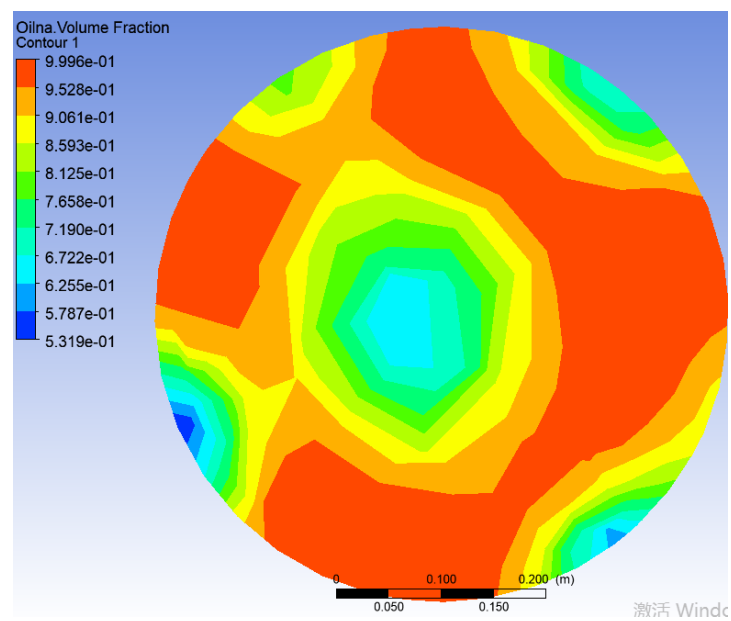

(E)

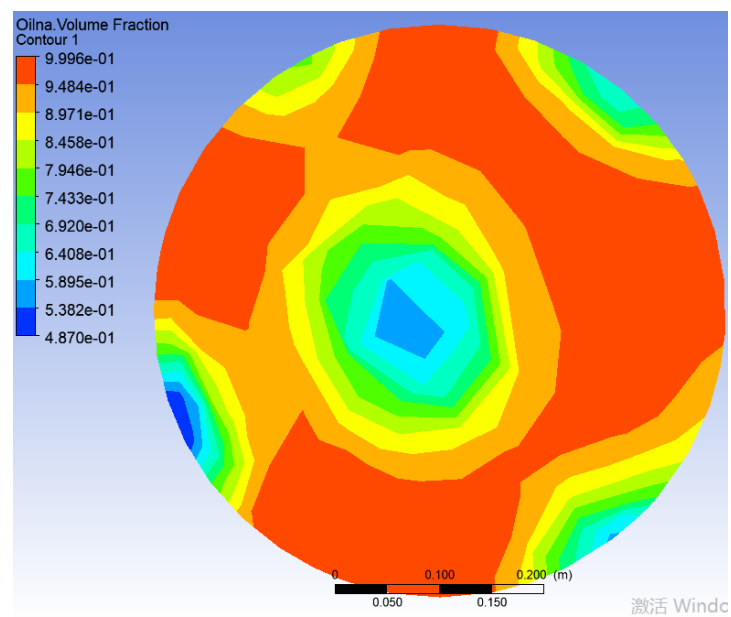

(F)

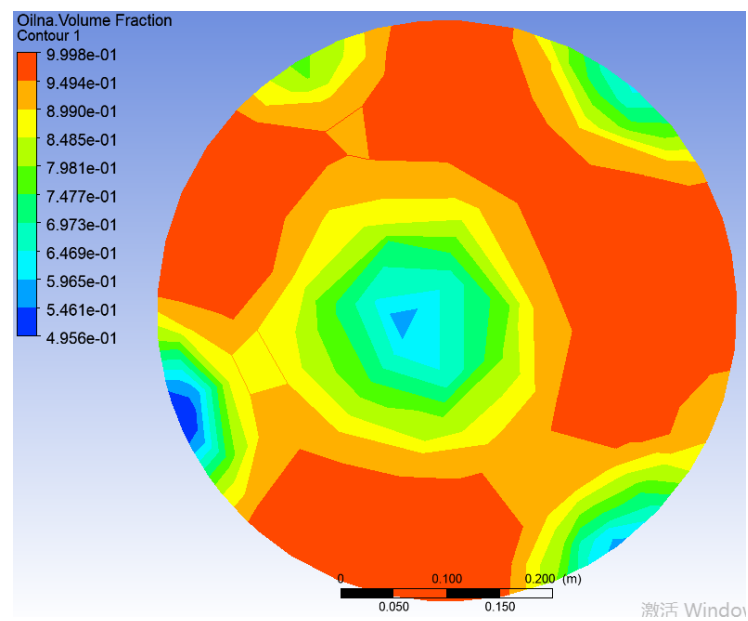

**Figure S2.** Distribution of oil and water at the outlet with different oil viscosity  
(A) 0.001Kg/(m\*s) (B) 0.003Kg/(m\*s) (C)0.005Kg/(m\*s) (D)0.007Kg/(m\*s)  
(E)0.009Kg/(m\*s) (F)0.012Kg/(m\*s)

(A)

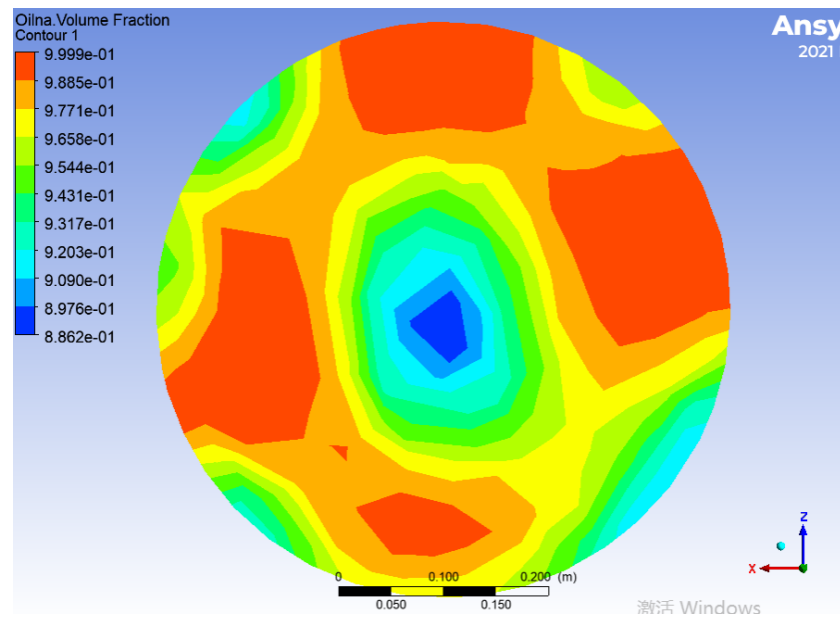

(B)

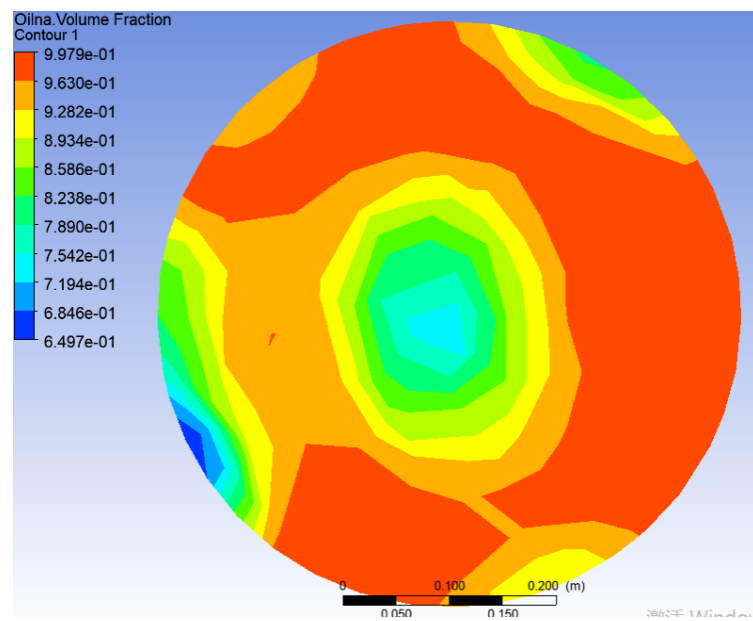

(C)

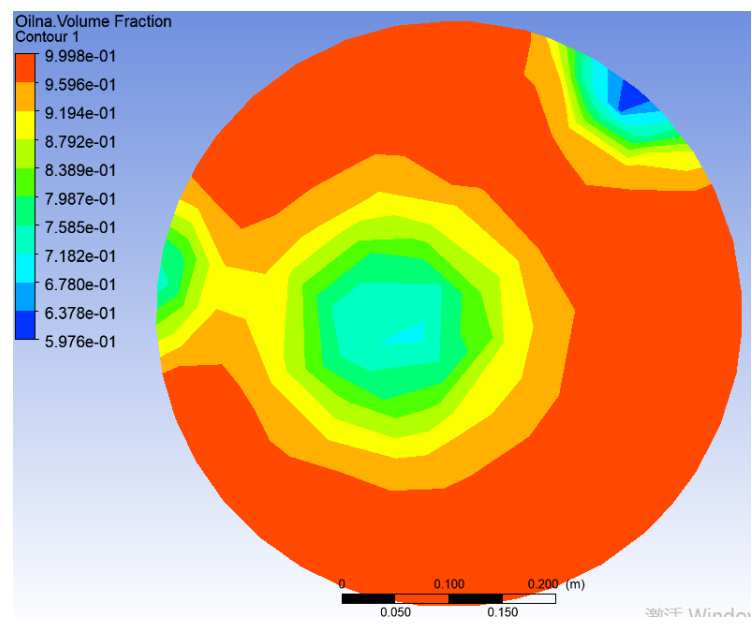

(D)

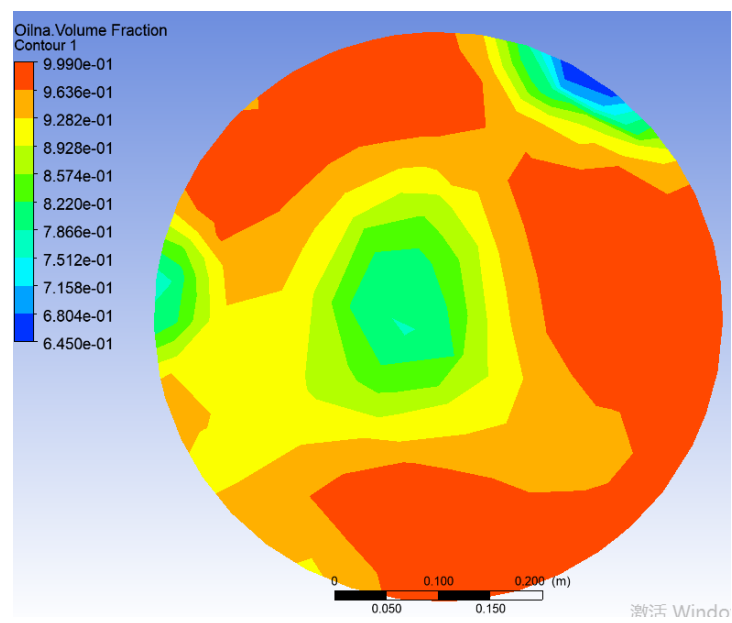

(E)

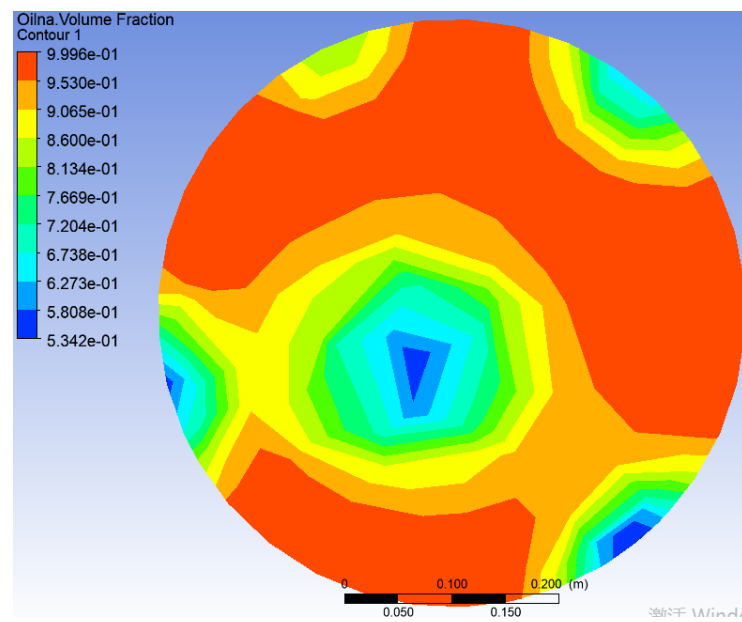

**Figure S3.** Distribution of oil and water at the outlet with Different quantities of injected water(A) 3% (B) 5% (C) 8% (D) 10% (E) 12%

(A)

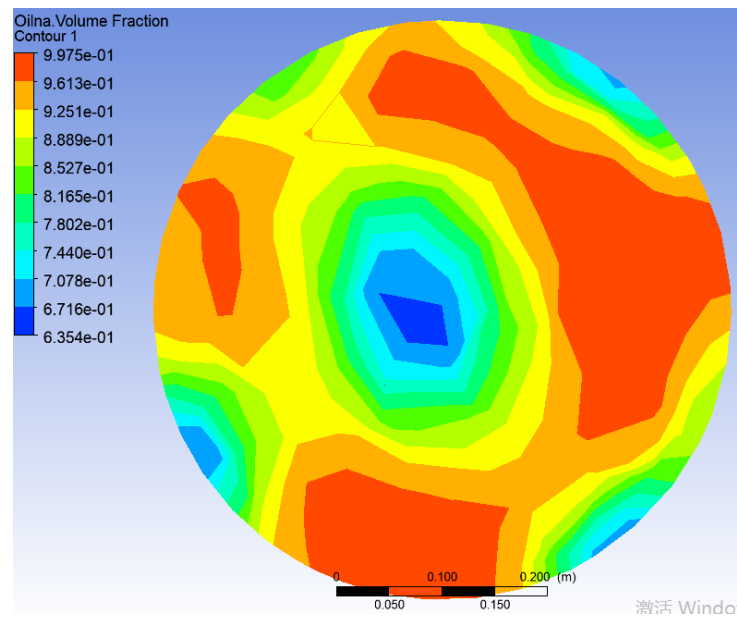

(B)

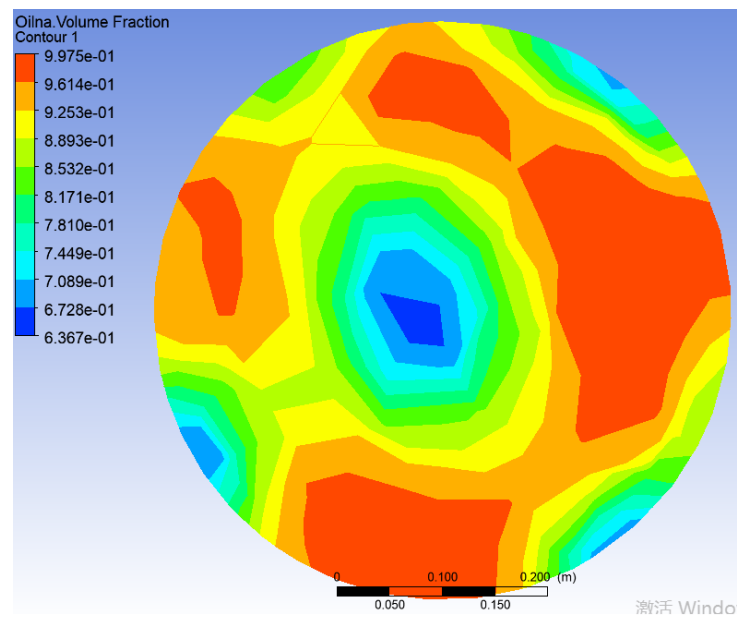

(C)

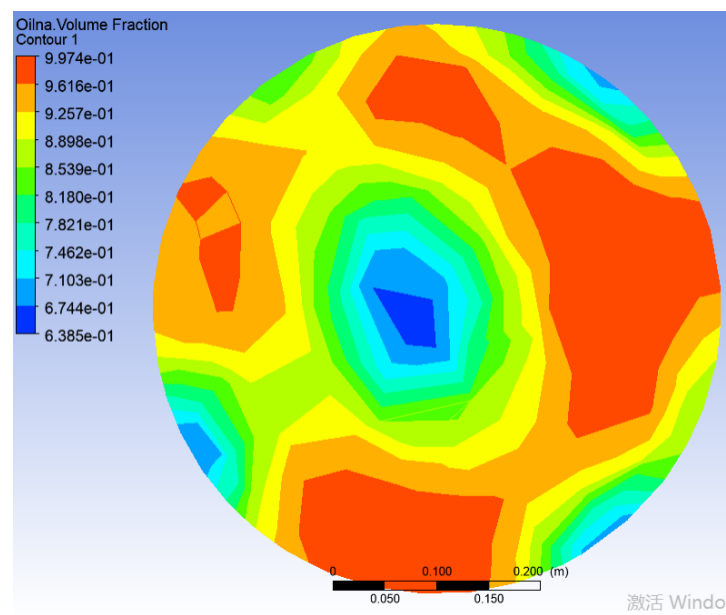

(D)

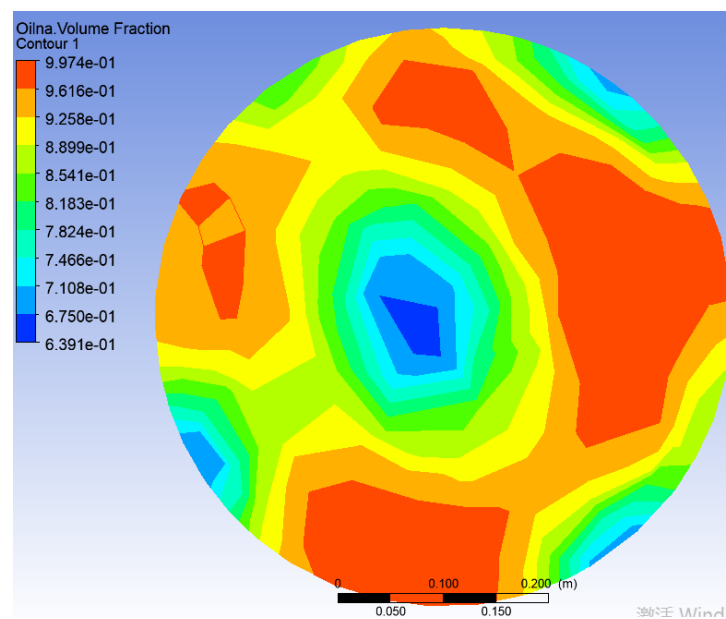

**Figure S4.** Distribution of oil and water at the outlet with different Oil-water interfacial tension (A)  $10^{-6}$  N/m (B) 0.005 N/m (C) 0.01 N/m (D) 0.02 N/m
